# Supplementary material
Source: MDPI journal article supplement (https://www.mdpi.com/2073-4395/11/1/75)
Supplement: s1 [file s1]

**Table S1.** Summary of the physiological response of *Pinot gris* to WS when grafted on different rootstocks.

| Soil water condition | Biomass                          | WU                               | LWP                            | A                                |
|----------------------|----------------------------------|----------------------------------|--------------------------------|----------------------------------|
| WW                   | P, Z17 ↑<br>SO4 –<br>G28, G121 ↓ | P, Z17 ↑<br>SO4 –<br>G28, G121 ↓ | -                              | P, Z17 ↑<br>SO4 –<br>G28, G121 ↓ |
| WS                   | P, Z17, SO4 ↓<br>G28, G121 -     | P, Z17, SO4 -/↓<br>G28, G121 ↓   | P, Z17, SO4 ↓<br>G28, G121 -/↓ | P, Z17, SO4,<br>G28, G121 ↓      |

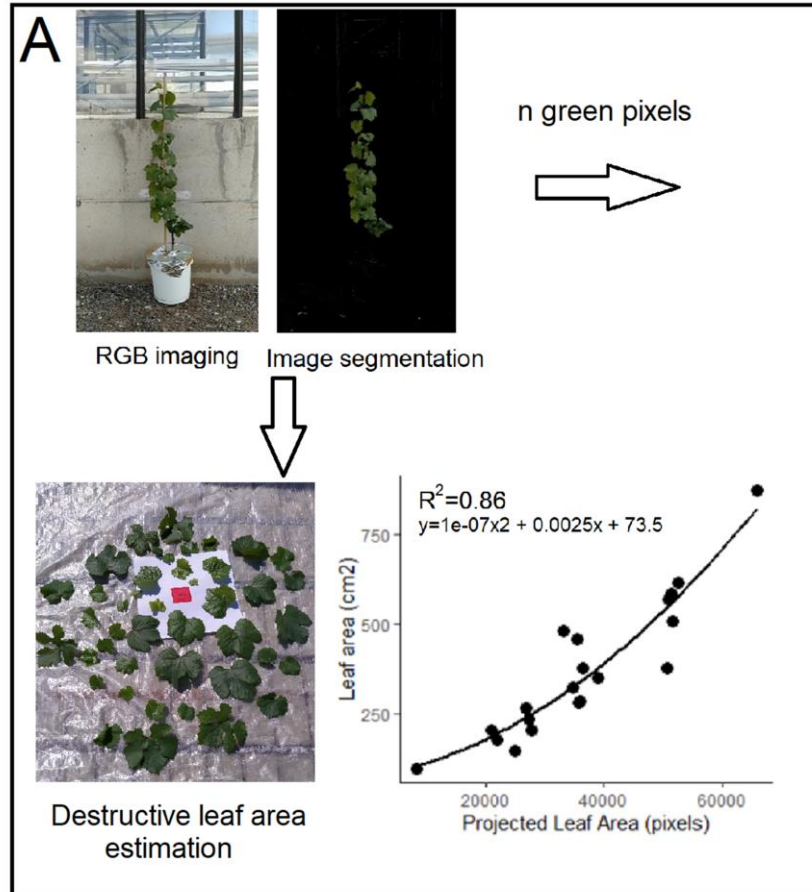

**Figure S1.** Pipeline for RGB imaging and PLA estimation and relative correlation between PLA (non-destructive) and leaf area (destructive).
